# Supplementary material for: Effect of intramolecular π–π and CH–π interactions between ligands on structure, electrochemical and spectroscopic properties of fac-[Re(bpy)(CO)3(PR3)]+(bpy = 2,2′-bipyridine; PR3= trialkyl or triarylphosphines)
Source: Royal Society of Chemistry journal article supplement (doi:10.1039/b407947g), 2004-12-06
Supplement: b407947g.doc [file b407947g.doc]

**Supporting Information for:**

**Effect of Intramolecular - and CH- Interactions between Ligands on Structure, Electrochemical and Photophysical Properties of *fac*-[Re(bpy)(CO)3(PR3)]+ (bpy = 2,2’-Bipyridine; PR3 = Trialkyl or Triarylphosphines)**

**Hideaki Tsubaki, Shigeki Tohyama, Kazuhide Koike, Hideki Saitoh, and Osamu Ishitani***

Hideaki Tsubaki and Prof. Osamu Ishitani

Department of Chemistry, Graduate School of Science and Engineering, Tokyo Institute of Technology, O-okayama 2-12-1, Meguro-ku, Tokyo 152-8551, Japan.

Dr. Kazuhide Koike

National Institute of Advanced Industrial Science and Technology, Onogawa 16-1, Tsukuba 305-8569, Japan.

Shigeki Tohyama and Dr. Hideki Saitoh.

National and Lifescience Research Center, Saitama University, Shimo-Okubo 255, Sakura-ku, Saitama 338-8570, Japan.

Page:

S2-4) ORTEP drawings of **2+**-**4+** and **7+** and **9+**.

S5) Three **CO frequencies for **1+**-**10+** measured in acetonitrile solution and plot of *E*pox− *E*1/2red versus the MLCT absorption maximum

S6) 1H-NMR data for **1+**-**10+** (300 MHz, in acetone-*d6*, 298K).

**Figure 1S.** ORTEP drawing of **2+**. Atoms interacting with each other are shown in red and are connected by blue-dotted lines. Counter anion was omitted for clarity. Interacting atom distances (Å): C(4)-H(15A) 2.460.

**Figure 2S.** ORTEP drawing of **3+**. Atoms interacting with each other are shown in red and are connected by blue-dotted lines. Counter anion was omitted for clarity. Interacting atom distances (Å): N(1)-C(14) 3.259(7), N(1)-C(19) 3.153(7), C(4)-C(19) 3.270(8) C(6)-C(18) 3.517(9), C(8)-C(14) 3.352(7), C(9)-C(15) 3.473(8), C(13)-H(25) 2.62.

**Figure 3S.** ORTEP drawing of **4+**. Atoms interacting with each other are shown in red and are connected by blue-dotted lines. Counter anion was omitted for clarity. Interacting atom distances (Å): N(1)-C(14) 3.271(9), C4-C(19) 3.208(13), N(2)-C(25) 3.193(9), C(13)-C(25) 3.242(10), N(2)-H(25) 2.71, C(9)-H(25) 2.65, C(10)-H(25) 2.89.

**Figure 4S.** ORTEP drawing of **7+**. Atoms interacting with each other are shown in red and are connected by blue-dotted lines. Counter anion was omitted for clarity.

**Figure 5S.** ORTEP drawing of **9+**. Atoms interacting with each other are shown in red and are connected by blue-dotted lines. Counter anion was omitted for clarity. Interacting atom distances (Å): C(4)-H(14A) 2.94.

**Figure 6S** Plot of *E*pox− *E*1/2red versus the MLCT absorption maximum measured in an MeCN solution at room temperature.

**Table S1.** Three **CO frequencies for **1+**-**10+** measured in acetonitrile solution.

|  | **CO / cm-1 | | |
| --- | --- | --- | --- |
| a’ | a” | a’ |
| **1+** | 2037 | 1947 | 1920 |
| **2+** | 2036 | 1947 | 1920 |
| **3+** | 2038 | 1951 | 1922 |
| **4+** | 2039 | 1952 | 1923 |
| **5+** | 2041 | 1954 | 1924 |
| **6+** | 2043 | 1957 | 1926 |
| **7+** | 2045 | 1958 | 1924 |
| **8+** | 2047 | 1962 | 1927 |
| **9+** | 2049 | 1965 | 1930 |
| **10+** | 2058 | 1978 | 1940 |

*a* All complexes were PF6- salts.

**Table S2.** 1H-NMR data for **1+**-**10+** (300 MHz, Acetone-*d6*, 298K).

|  | ** / ppm |
| --- | --- |
| **1+** | 9.35 (dd, 2H, *J* = 5.5, 1.4 Hz, bpy-6,6’), 8.89 (dd, 2H, *J* = 8.2, 1.4 Hz, bpy-3,3’), 8.50 (ddd, 2H, *J* = 8.2, 7.7, 1.4 Hz, bpy-4,4’), 7.95 (ddd, 2H, *J* = 7.7, 5.5, 1.4 Hz, bpy-5,5’), 1.5-1.6 (m, 6H, P*CH2*CH2CH2CH3), 1.1-1.3 (m, 9H, *J* = 7.0 Hz, PCH2*CH2CH2*CH3), 0.80 (t, 9H, *J* = 7.0 Hz, PCH2CH2CH2*CH3*) |
| **2+** | 9.33(dd, 2H, *J* = 5.6, 0.7 Hz, bpy-6,6’), 8.86 (dd, 2H, *J* = 8.0, 1.2 Hz, bpy-3,3’), 8.47 (dd, 2H, *J* = 8.0, 7.6, 0.7 Hz, bpy-4,4’), 7.93 (ddd, 2H, *J* = 7.6, 5.6, 1.2 Hz, bpy-5,5’), 1.59 (quintet, 6H, *J* = 7.2 Hz, P*CH2*CH3), 0.91 (td, 9H, *J* = 7.7, 15.4 Hz, PCH2*CH3*) |
| **3+** | 8.92 (dd, 2H, *J* = 5.5, 0.8 Hz, bpy-6,6’), 8.55 (dd, 2H, *J* = 8.1, 1.4 Hz, bpy-3,3’), 8.29 (ddd, 2H, *J* = 8.1, 7.6, 0.8 Hz, bpy-4,4’), 7.65 (ddd, 2H, *J* = 7.6, 5.5, 1.4 Hz, bpy-5,5’), 7.2-7.1 (m, 6H, Ph-*m*), 7.0-6.8 (m, 6H, Ph-*o*), 3.82 (s, 9H, CH3O-Ph) |
| **4+** | 8.89 (dd, 2H, *J* = 5.6, 0.7 Hz, bpy-6,6’), 8.53 (dd, 2H, *J* = 8.1, 1.4 Hz, bpy-3,3’), 8.27 (ddd, 2H, *J* = 8.1, 7.6, 0.7 Hz, bpy-4,4’), 7.62 (ddd, 2H, *J* = 7.6, 5.6, 1.4 Hz, bpy-5,5’), 7.25-7.05 (m, 12H, Ph-*o, m*), 2.33 (s, 9H, CH3-Ph) |
| **5+** | 8.89 (dd, 2H, *J* = 5.6, 0.7 Hz, bpy-6,6’), 8.60 (dd, 2H, *J* = 8.3, 1.2 Hz, bpy-3,3’), 8.26 (ddd, 2H, *J* = 8.3, 7.5, 0.7 Hz, bpy-4,4’), 7.61 (ddd, 2H, *J* = 7.5 5.6, 1.2 Hz, bpy-5,5’), 7.51-7.43 (m, 3H, Ph-*p*), 7.43-7.34 (m, 6H, Ph-*m*), 7.3-7.2 (m, 6H, Ph-*o*) |
| **6+** | 8.95 (dd, 2H, *J* = 5.5, 0.7 Hz, bpy-6,6’), 8.60 (dd, 2H, *J* = 7.1, 0.8 Hz, bpy-3,3’), 8.31 (td, 2H, *J* = 7.1, 0.7 Hz, bpy-4,4’), 7.68 (ddd, 2H, *J* = 7.1, 5.5, 0.8 Hz, bpy-5,5’), 7.40-7.25 (m, 6H, Ph-*m*), 7.25-7.15 (m, 6H, Ph-*o*) |
| **7+** | 9.23 (dd, 2H, *J* = 5.4, 1.0 Hz, bpy-6,6’), 8.85 (dd, 2H, *J* = 8.3, 0.7 Hz, bpy-3,3’), 8.45 (ddd, 2H, *J* = 8.3, 7.7, 1.0 Hz, bpy-4,4’), 7.93 (ddd, 2H, *J* = 7.7, 5.4, 0.7 Hz, bpy-5,5’), 4.5-4.7 (m, 3H, PO*CH*(CH3)2), 1.08 (d, 18H, *J* = 6.1 Hz, POCH(*CH3)2*) |
| **8+** | 9.22 (dd, 2H, *J* = 5.6, 1.0 Hz, bpy-6,6’), 8.83 (dd, 2H, *J* = 8.3, 1.2 Hz, bpy-3,3’), 8.45 (ddd, 2H, *J* = 8.3, 7.6, 1.0 Hz, bpy-4,4’), 7.90 (ddd, 2H, *J* = 7.6, 5.6, 1.2 Hz, bpy-5,5’), 3.94 (quintet, 6H, *J* = 7.0 Hz, PO*CH2*CH3), 1.05 (t, 9H, *J* = 7.0 Hz, POCH2*CH3*) |
| **9+** | 9.23 (dd, 2H, *J* = 5.6, 0.8 Hz, bpy-6,6’), 8.83 (dd, 2H, *J* = 8.3, 1.4 Hz, bpy-3,3’), 8.45 (ddd, 2H, *J* = 8.3, 7.7, 0.8 Hz, bpy-4,4’), 7.89 (ddd, 2H, *J* = 7.7, 5.6, 1.4 Hz, bpy-5,5’), 3.56 (d, 9H, *J* = 11.0 Hz, PO*CH3*) |
| **10+** | 9.01 (dd, 2H, *J* = 5.1, 0.9 Hz, bpy-6,6’), 8.76 (dd, 2H, *J* = 8.1, 1.2 Hz, bpy-3,3’), 8.40 (ddd, 2H, *J* = 8.1, 7.8, 0.9 Hz, bpy-4,4’), 7.77 (ddd, 2H, *J* = 7.8, 5.1, 1.2 Hz, bpy-5,5’), 7.4-7.3 (m, 6H, Ph-*m*), 7.3-7.2 (m, 3H, Ph-*p*), 7.1-6.9 (m, 6H, Ph-*o*) |
| **Free- bpy** | 8.66 (dd, 2H, *J* = 4.6, 1.7 Hz, bpy-6,6’), 8.48 (dd, 2H, *J* = 8.0, 0.9 Hz, bpy-3,3’), 7.91 (td, 2H, *J* = 8.0, 1.7 Hz, bpy-4,4’), 7.40 (ddd, 2H, *J* = 8.0, 4.6, 0.9 Hz, bpy-5,5’) |
