# Supplementary figures and images for: Effect of intramolecular π–π and CH–π interactions between ligands on structure, electrochemical and spectroscopic properties of fac-[Re(bpy)(CO)3(PR3)]+(bpy = 2,2′-bipyridine; PR3= trialkyl or triarylphosphines)
Source: Royal Society of Chemistry journal article supplement (doi:10.1039/b407947g), 2004-12-06

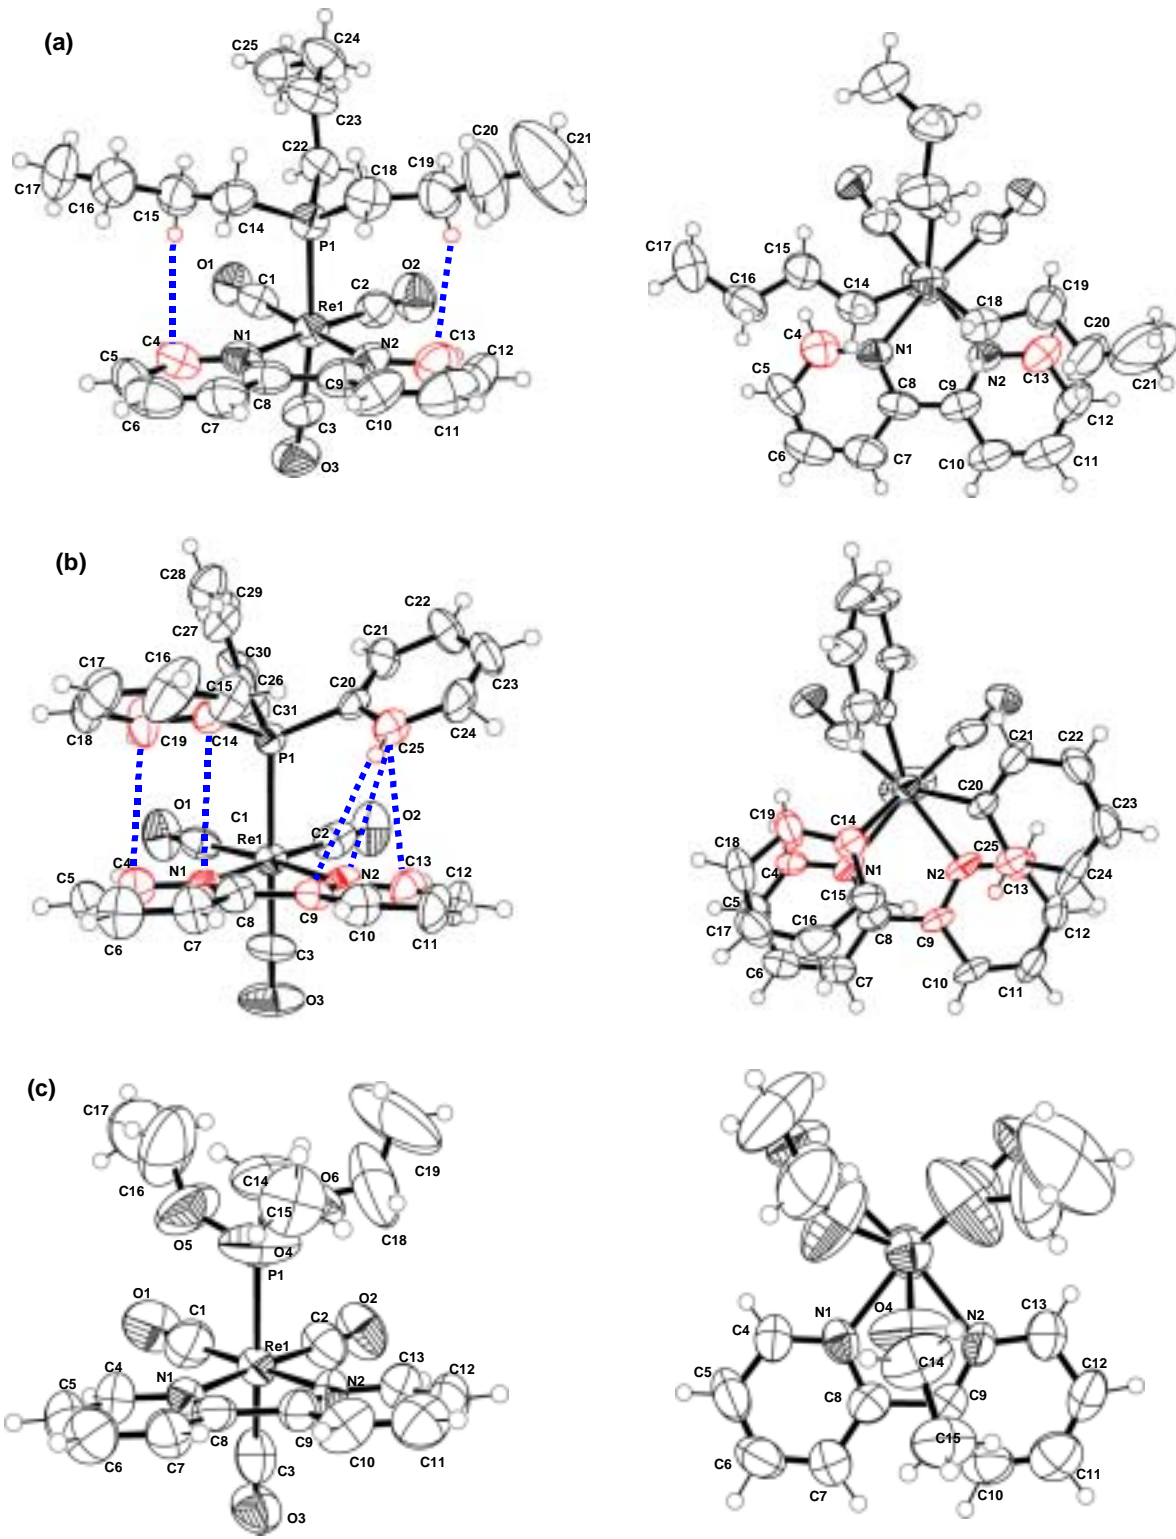

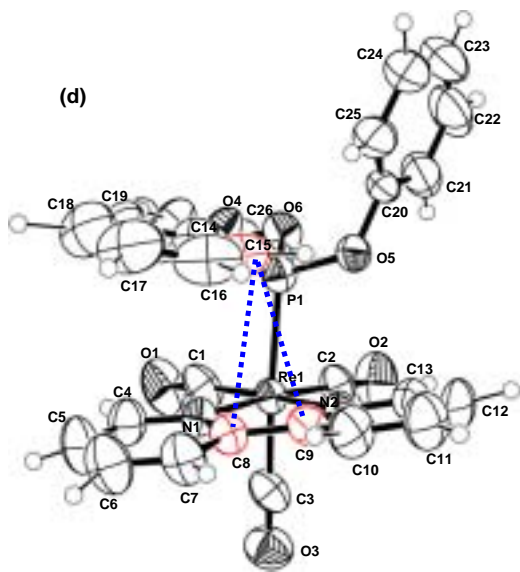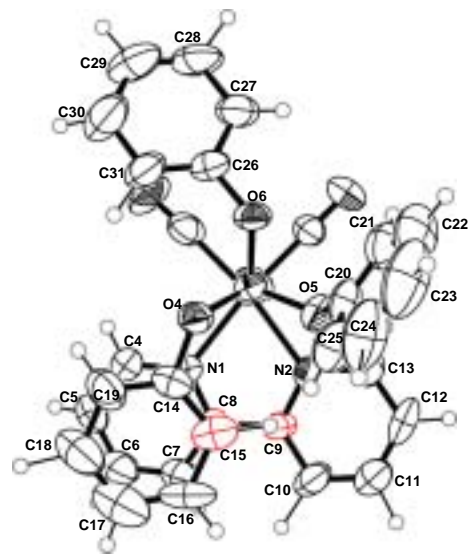

Supplement: b407947g.pdf [file b407947g.pdf]
